# Supplementary material for: Caspase-11–mediated endothelial pyroptosis underlies endotoxemia-induced lung injury
Source: JCI journal article supplement (doi:10.1172/jci94495), 2017-10-08
Supplement: sd1 [file 1]

## Supplemental Figure 1

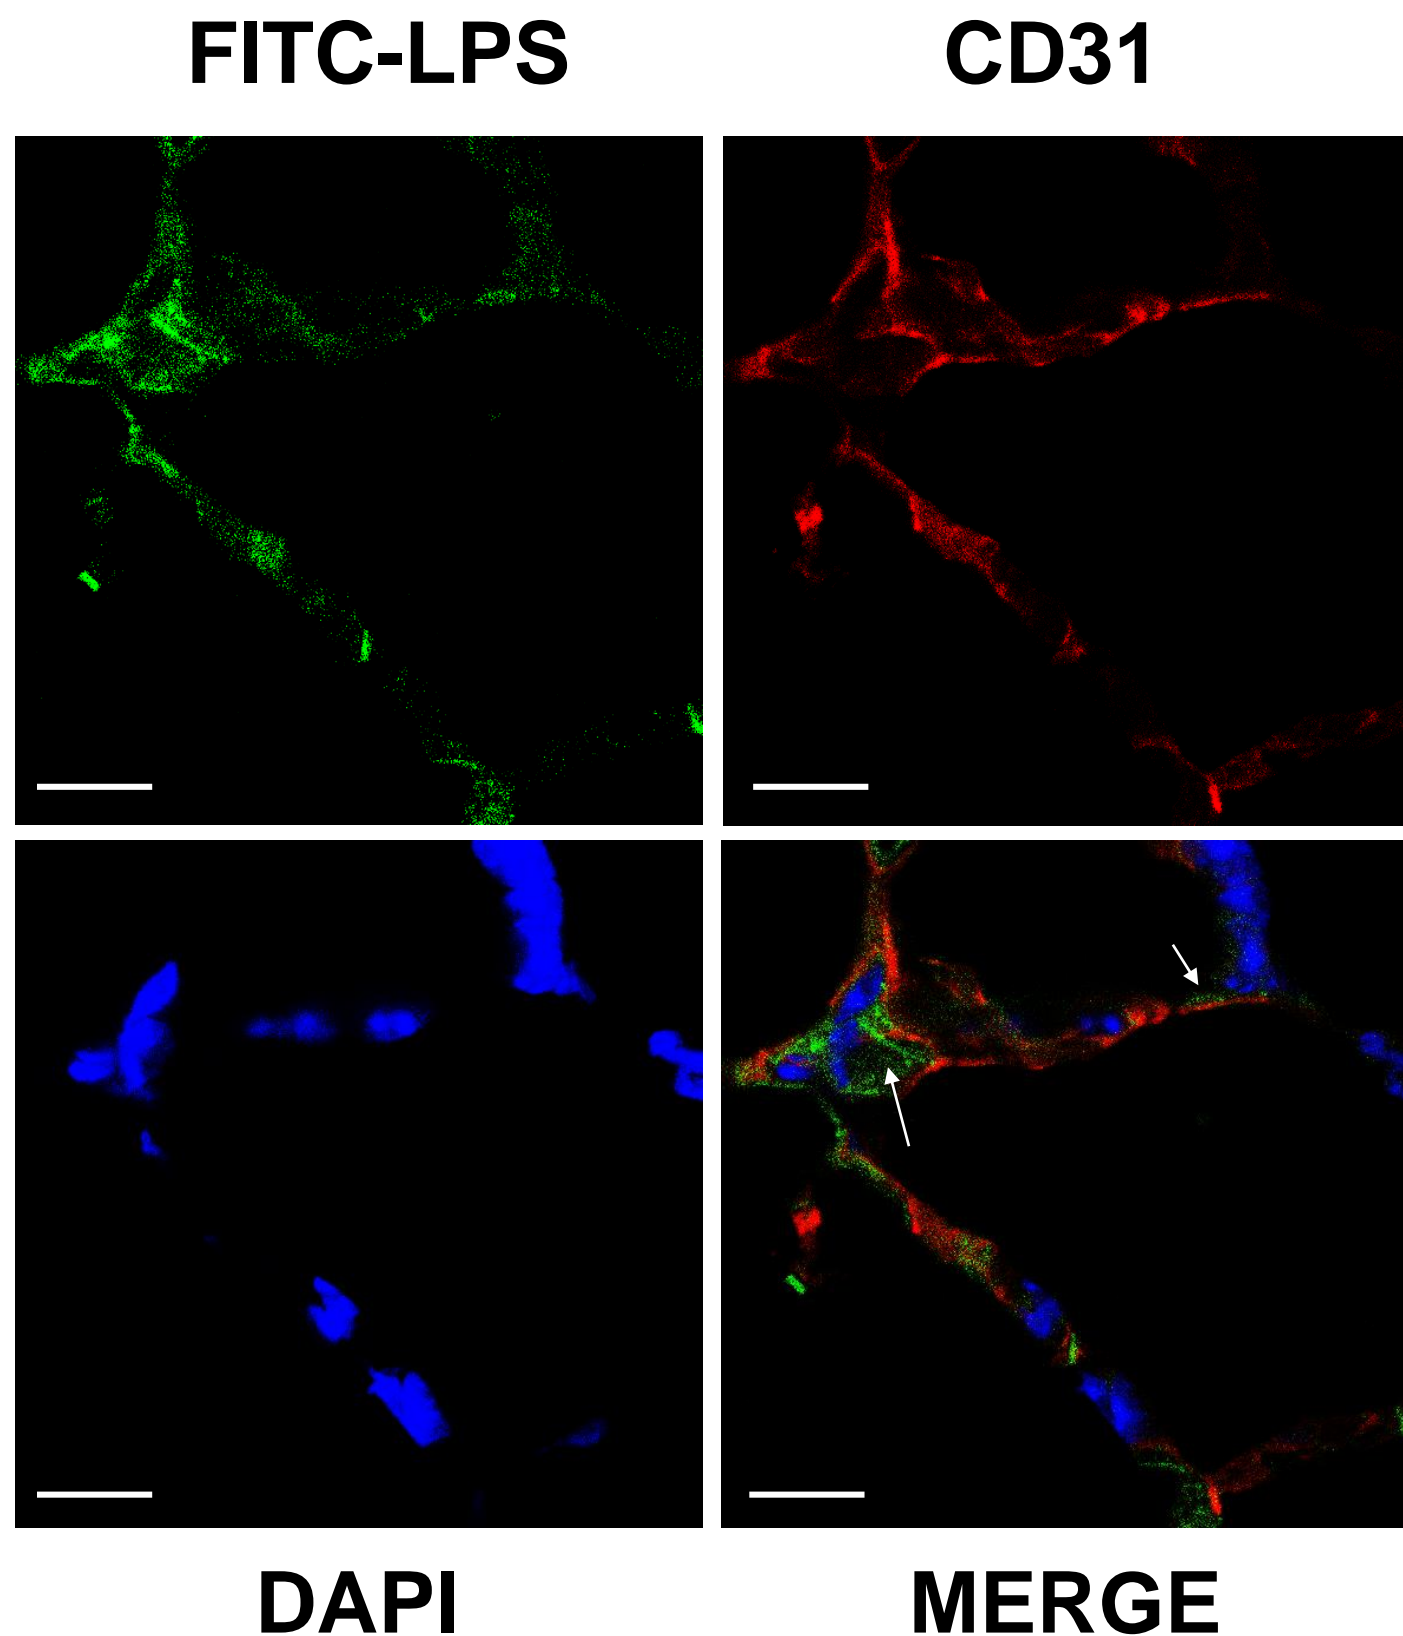

**Supplemental Figure 1. Internalization of LPS *in vivo*.** C57BL/6 mice were injected i.p. with 10 mg/kg FITC-LPS (Green) for 16 hours. Lungs were harvested post a cardiac perfusion with PBS. OCT-embedded cryosections were immunostained with anti-CD31 antibodies (Red). Nuclear DNA was labeled by DAPI (Blue). Confocal image results show LPS internalization in lung microvascular endothelial cells following LPS treatment. Scale bar, 10  $\mu$ m. Please also see the Supplemental video.

## Supplemental Figure 2

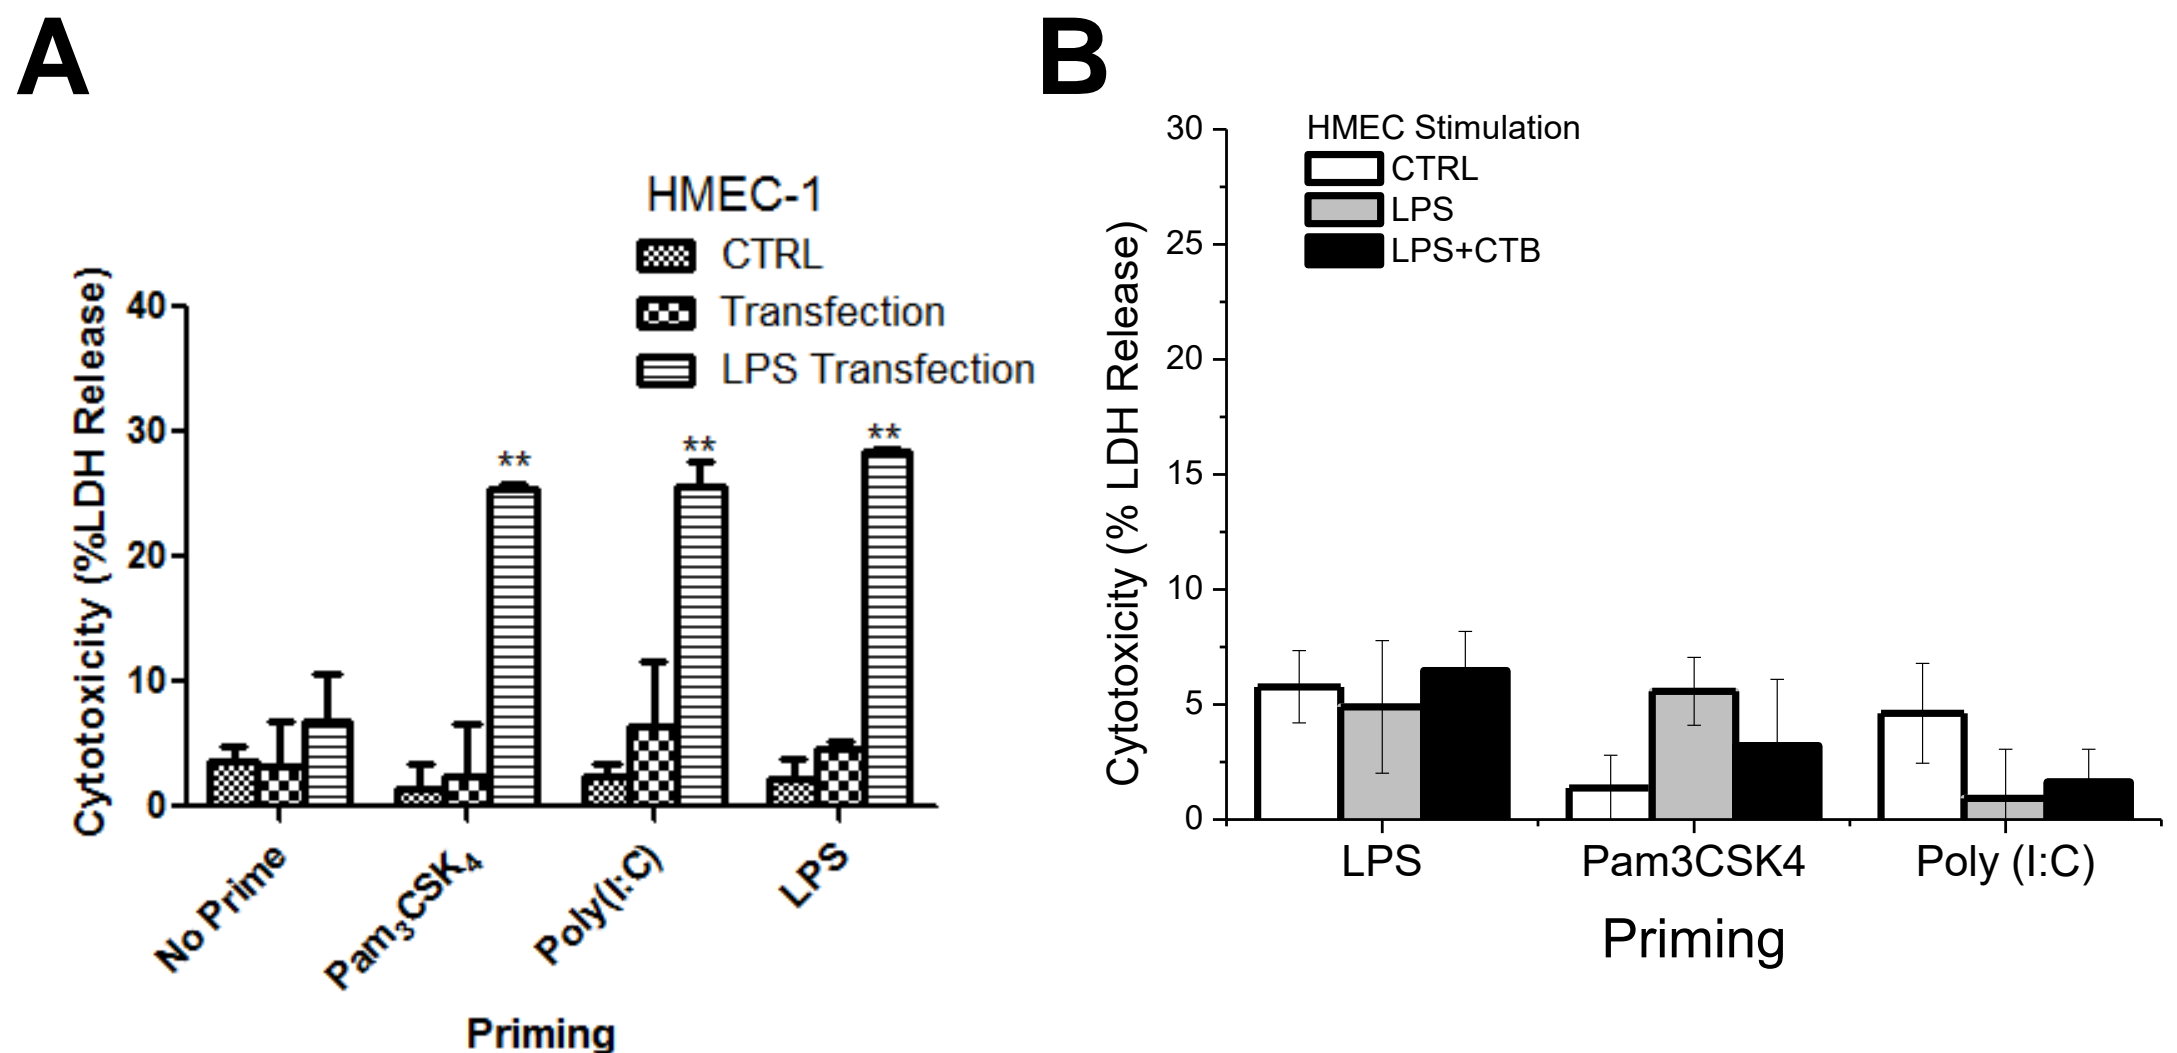

**Supplemental Figure 2. Evaluation of LDH release in HMEC-1.** (A) LDH release by human dermal microvascular endothelial cell (HMEC-1). Cells were primed for 6 h with 1  $\mu\text{g}/\text{ml}$  LPS, Pam3CSK4, or 5  $\mu\text{g}/\text{ml}$  poly(I:C). Primed cells were either untreated (CTRL); Mock transfection (transfection); or transfected with 2  $\mu\text{g}/\text{ml}$  LPS for 16 h (LPS transfection). (B) LDH release in primed HMEC-1 after culture in medium alone (CTRL), 2  $\mu\text{g}/\text{ml}$  LPS or 2  $\mu\text{g}/\text{ml}$  LPS together with 20  $\mu\text{g}/\text{ml}$  cholera toxin B (CTB) for 16 h.

## Supplemental Figure 3

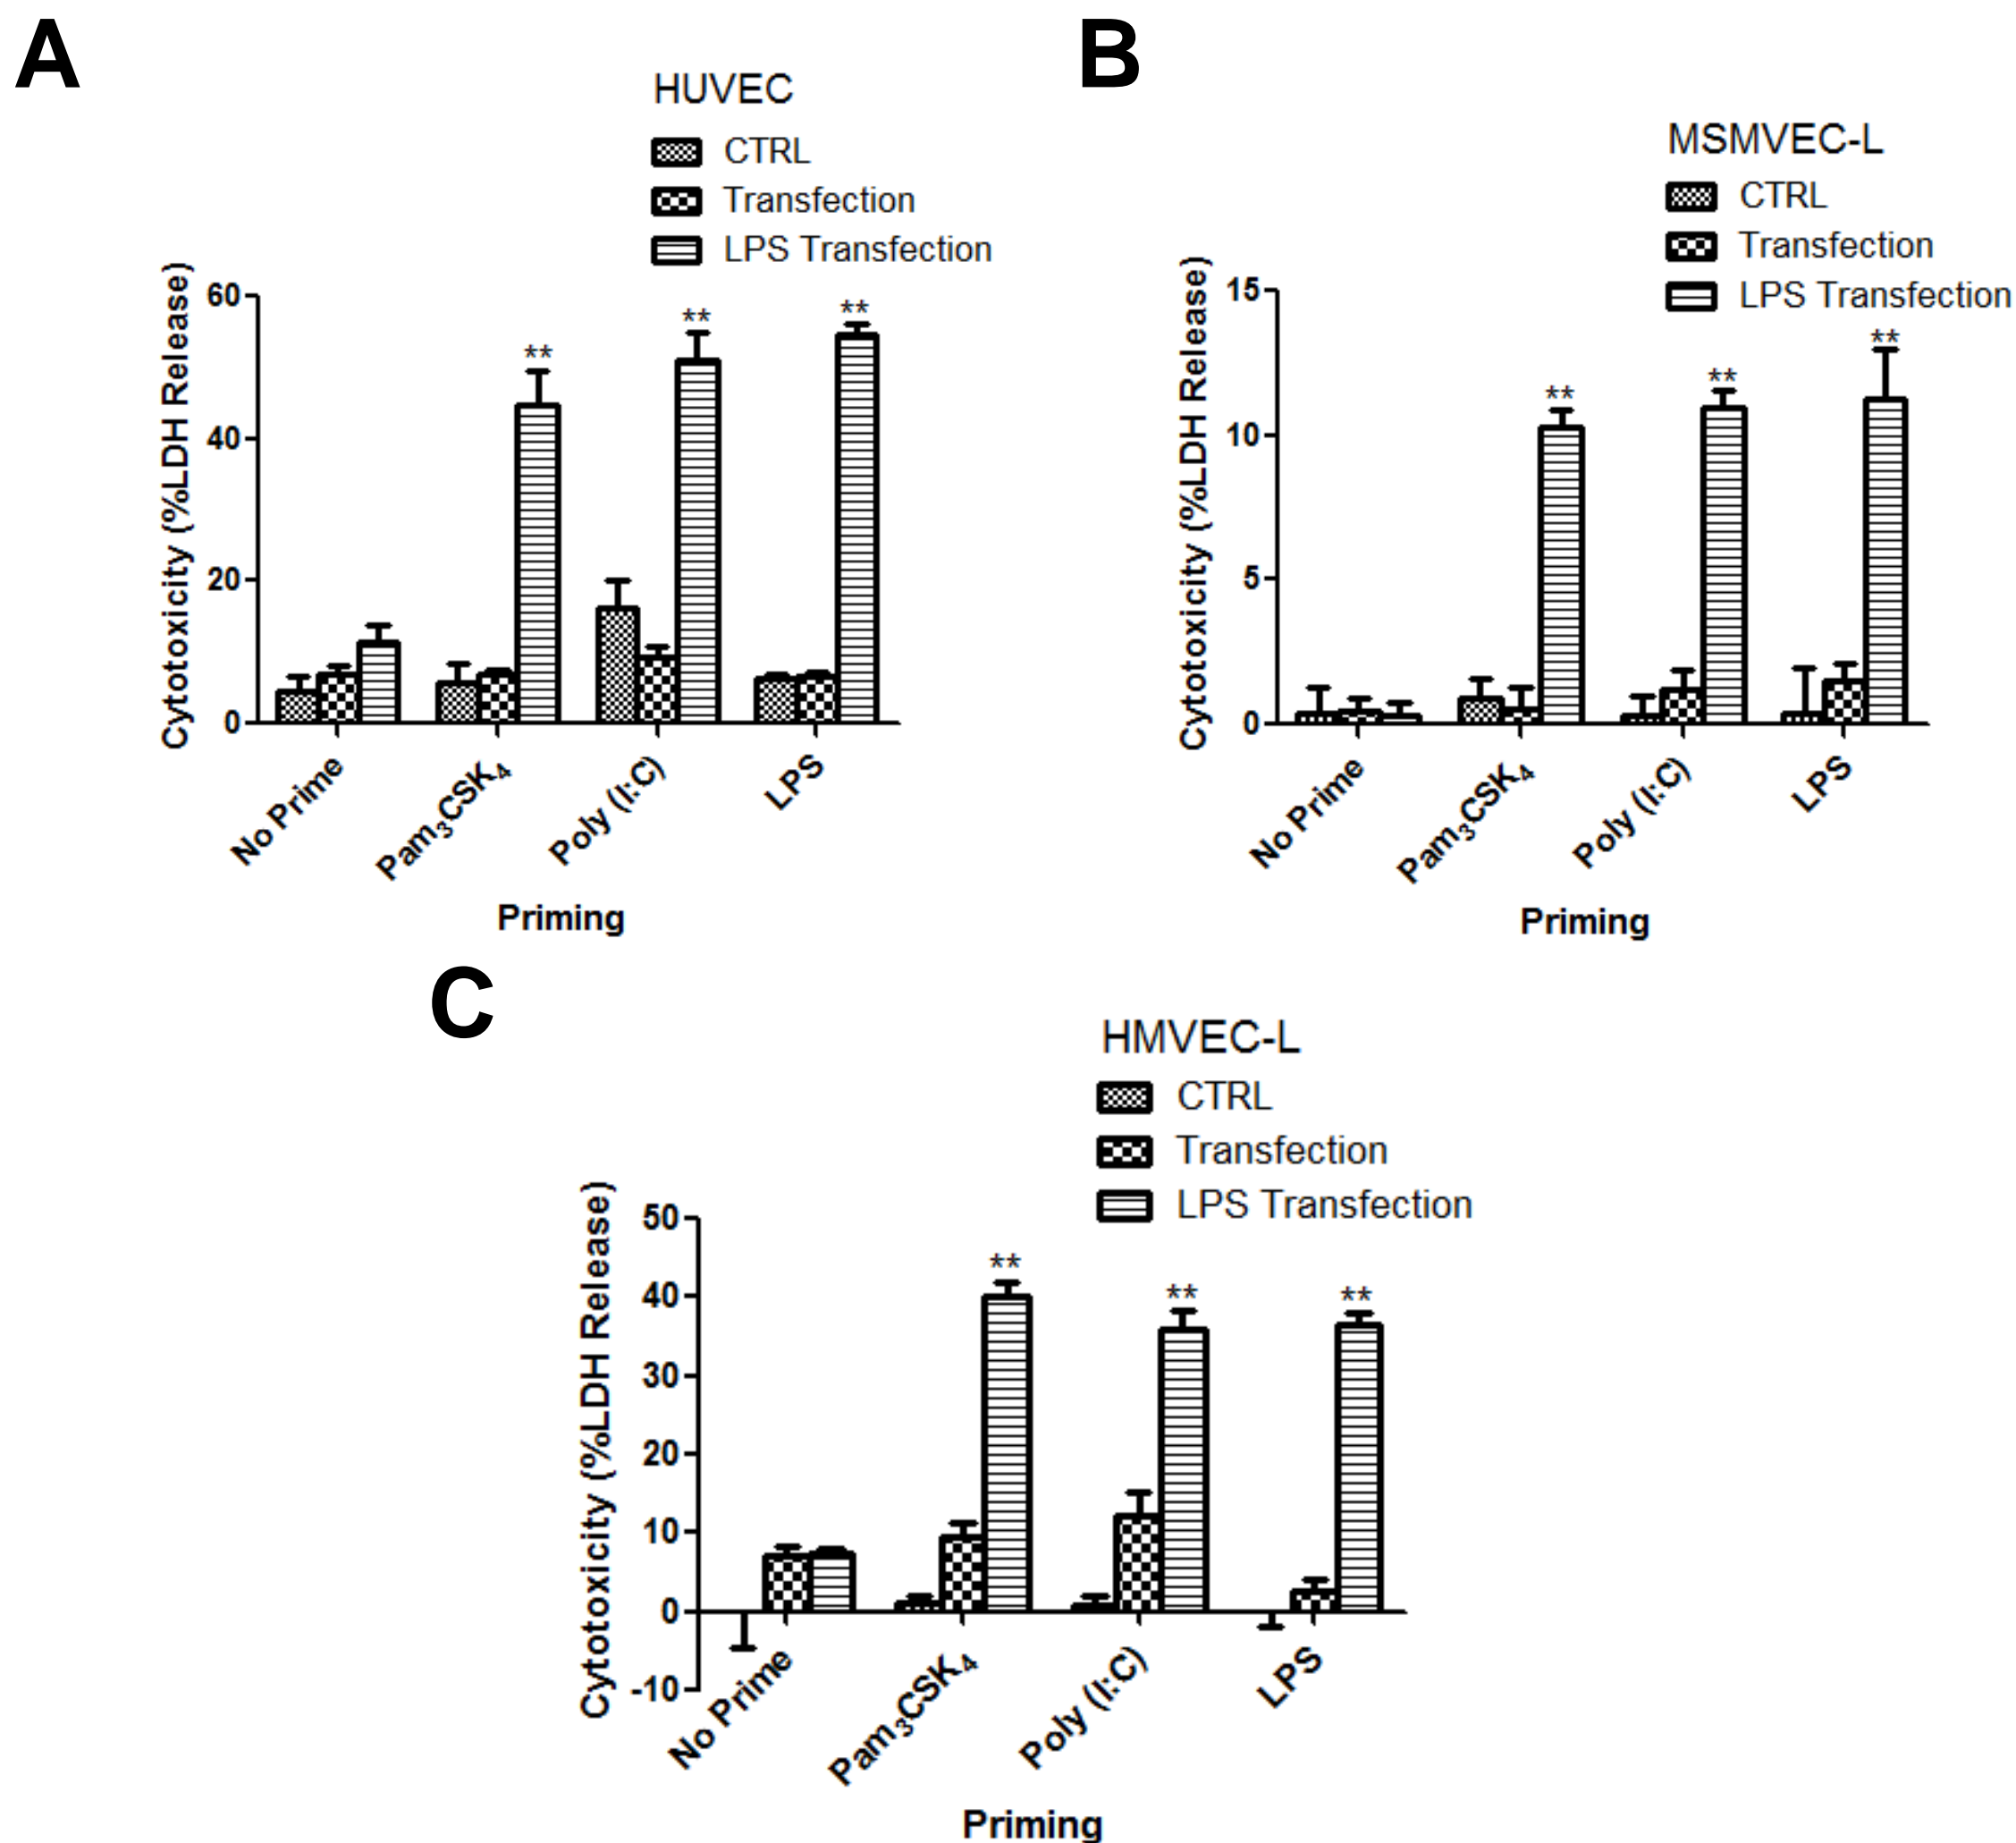

**Supplemental Figure 3. Measurement of LDH release.** LDH release by Human Umbilical Vein Endothelial Cells (HUVEC) (A); Mouse lung microvascular endothelial cell (MsMVEC-L) (B); and human lung microvascular endothelial cell (hMVEC) (C). Cells were primed for 6 h with 1  $\mu$ g/ml LPS, Pam3CSK4, or 5  $\mu$ g/ml poly(I:C). Primed cells were transfected with 2  $\mu$ g/ml LPS (LPS transfection) or without LPS (transfection) for 16 h.

## Supplemental Figure 4

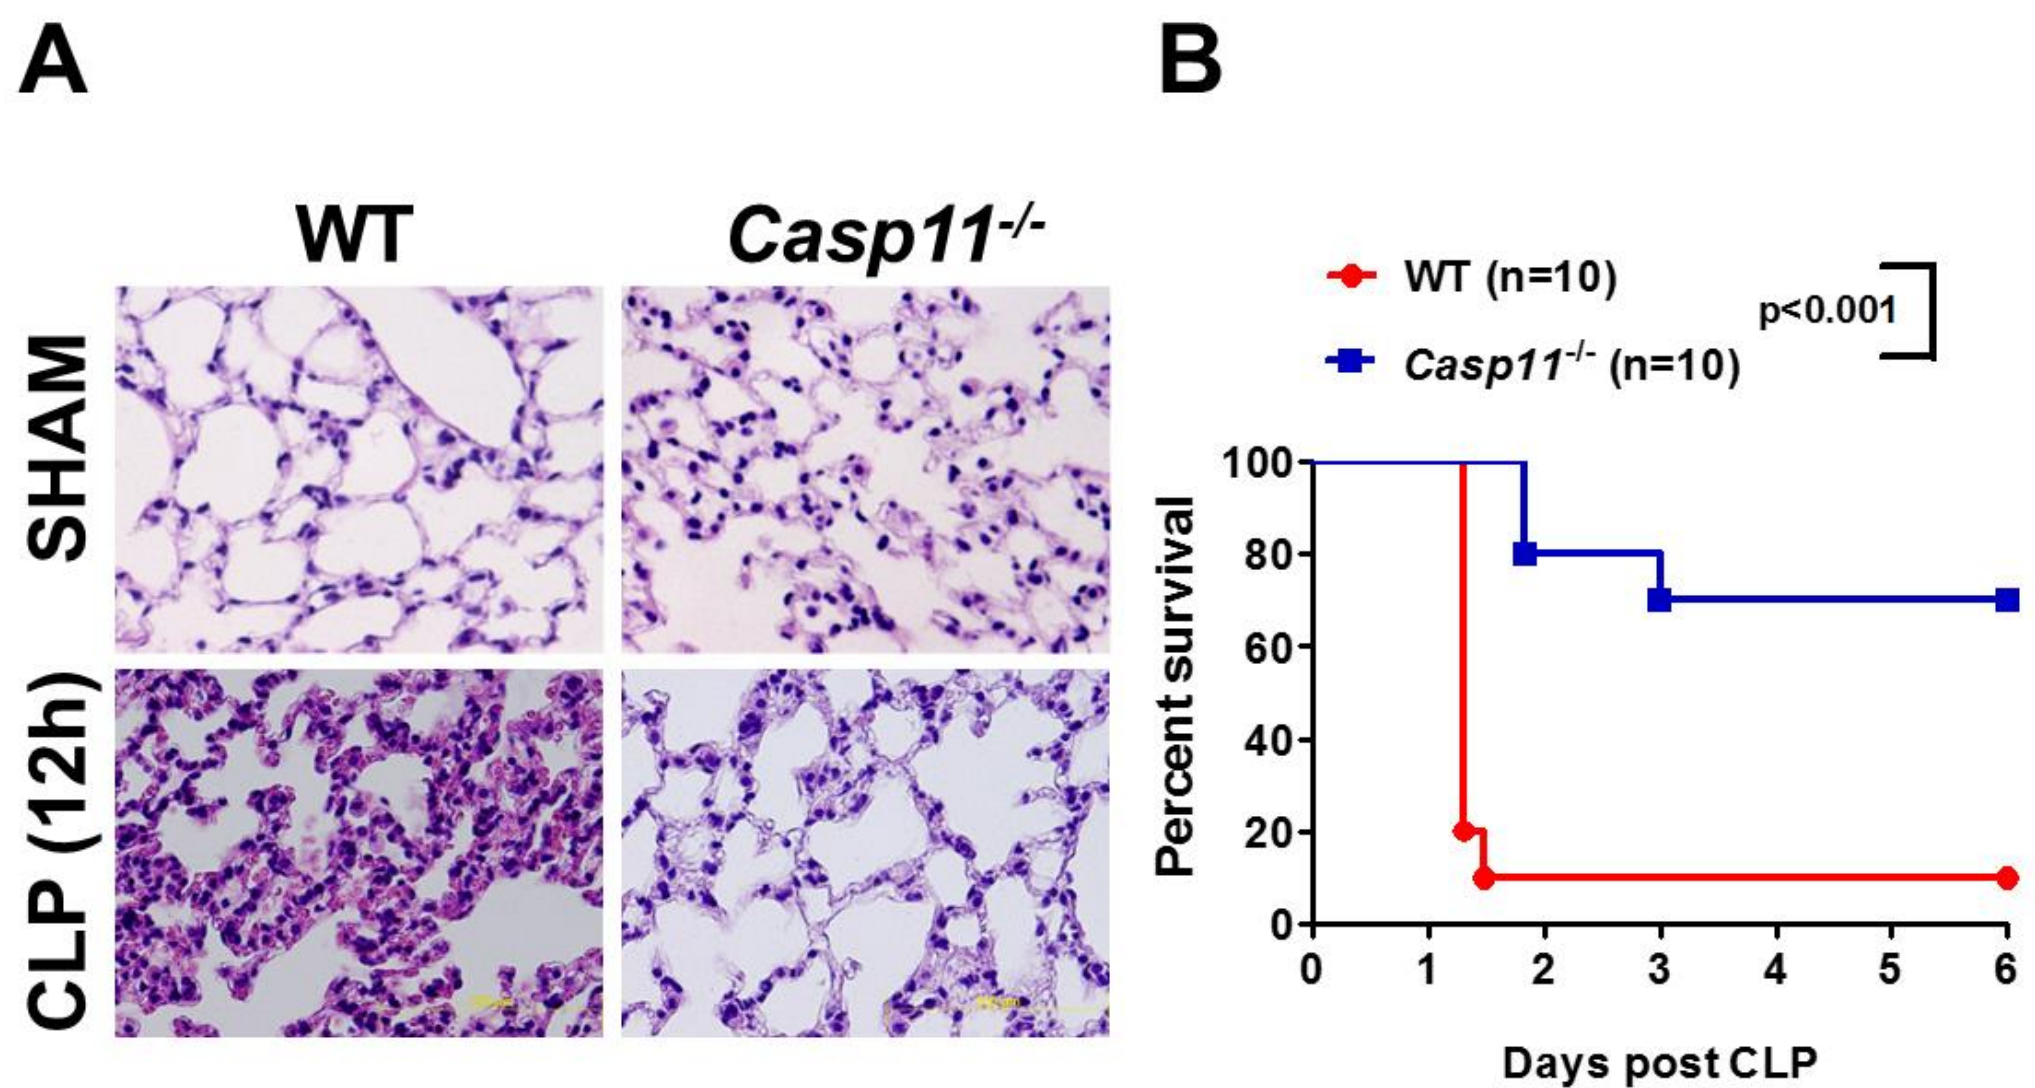

**Supplemental Figure 4. Disruption of Caspase-11 protects against CLP-induced lung injury and mortality.** (A) Representative H&E staining of lung sections from *Casp11*<sup>-/-</sup> and control mice post CLP surgery for 12 hours (scale bar, 100 $\mu$ m). (B) CLP surgery was performed and survival analyzed using Kaplan-Meier log-rank test to compare *Casp11*<sup>-/-</sup> (n=10) and control wild type mice (n=10).

## Supplemental Figure 5

### A

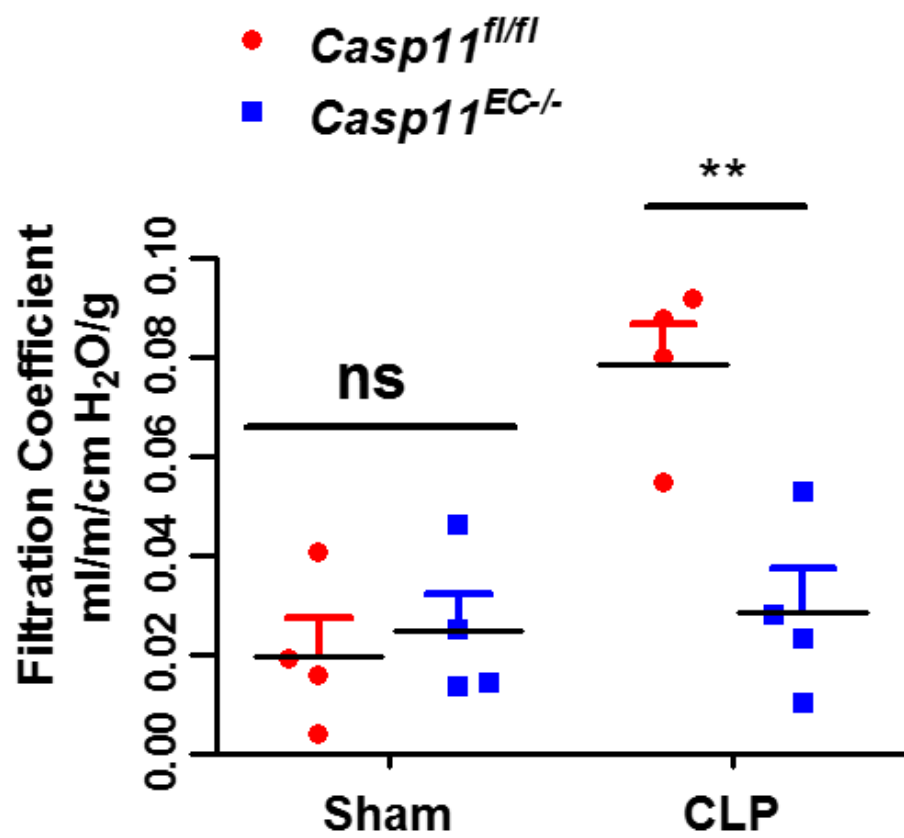

### B

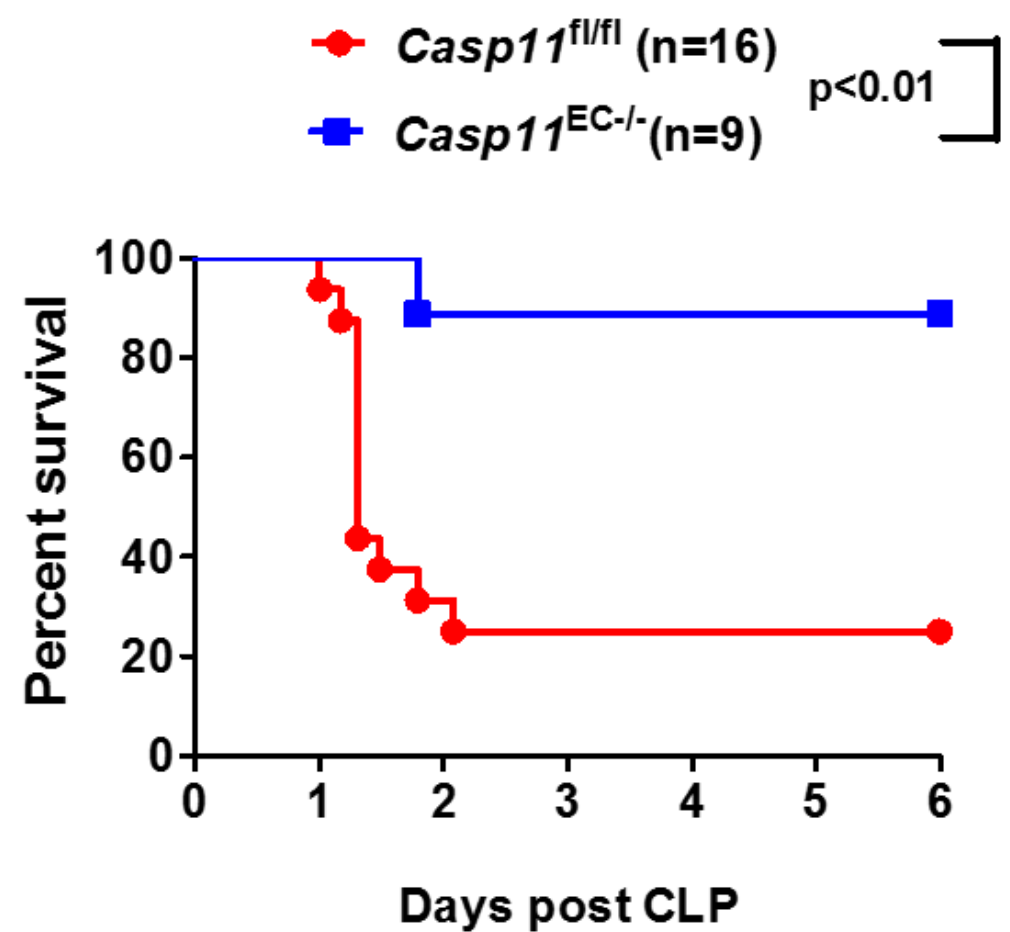

**Supplemental Figure 5. Loss of endothelial Caspase-11 protects against CLP-induced lung injury and mortality.** (A) The lung microvessel filtration coefficient was assessed in *Casp11<sup>fl/fl</sup>* and *Casp11<sup>EC-/-</sup>* mice following CLP surgery for 12 hours. (B) CLP surgery was performed and survival analyzed using Kaplan-Meier log-rank test to compare *Casp11<sup>EC-/-</sup>* (n=9) and control *Casp11<sup>fl/fl</sup>* mice (n=16).

## Supplemental Figure 6

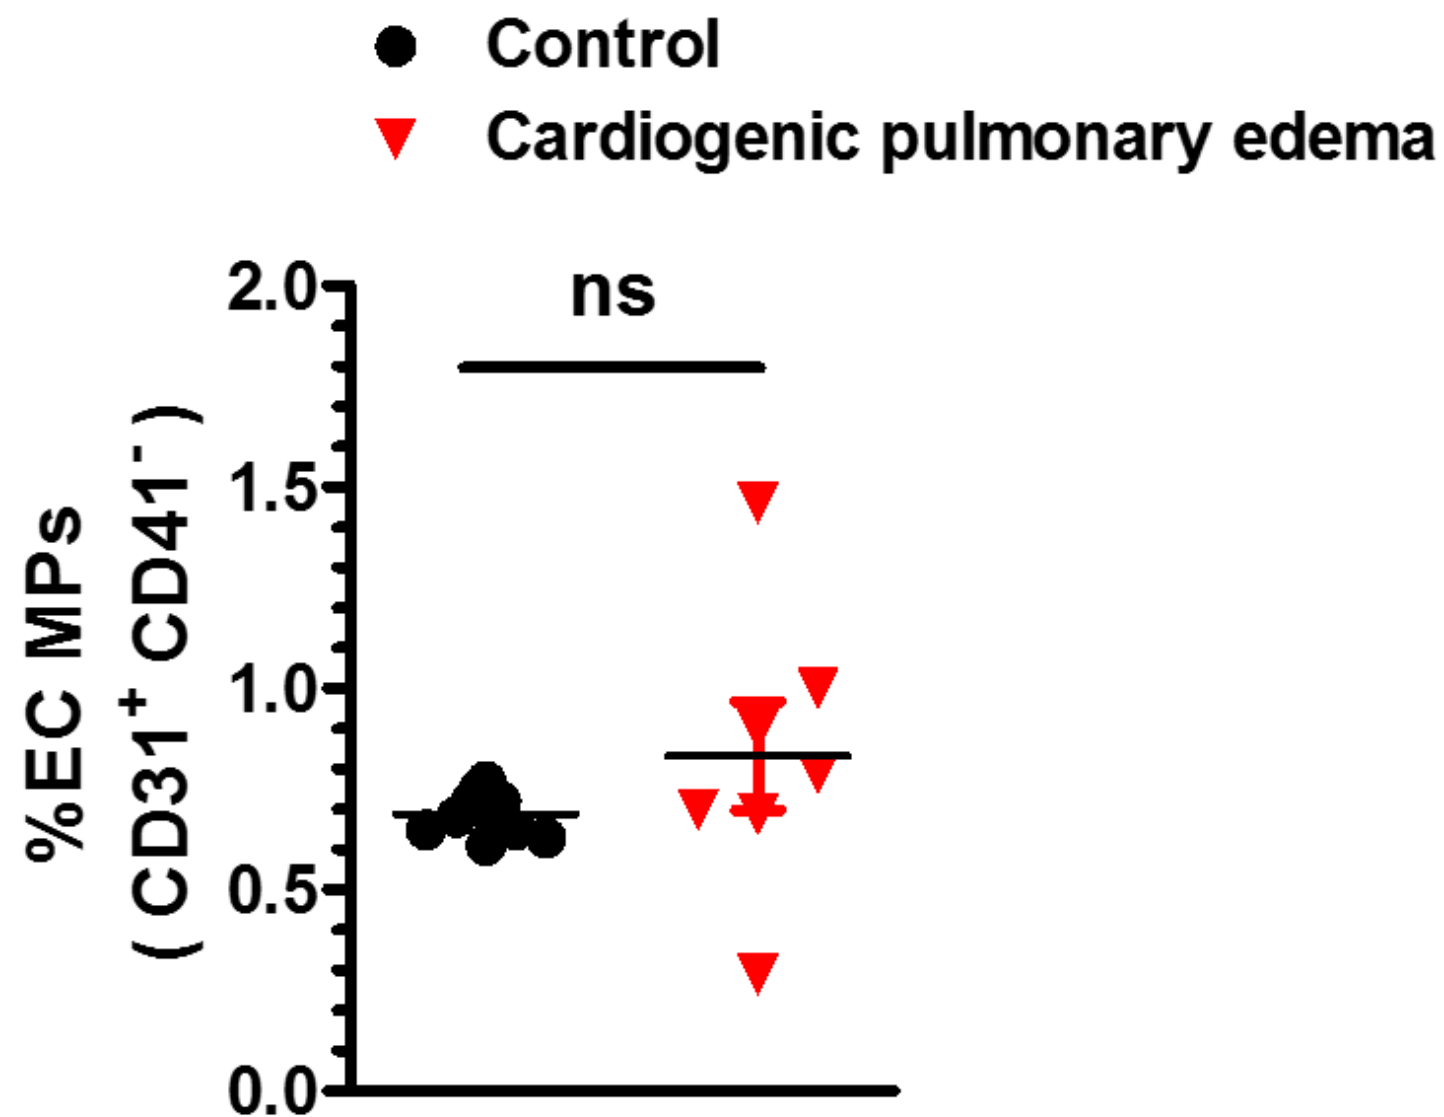

**Supplemental Figure 6. Endothelial MPs levels in plasma of healthy volunteers and cardiogenic pulmonary patients.** Assessment of endothelial derived MPs from plasma of healthy volunteers (Control, n=10) and cardiogenic pulmonary edema patients (n=7) (described in Supplement Table). No significant difference was observed for endothelial MPs production in plasma from cardiogenic pulmonary edema patients compared with healthy control.

## Supplemental Table 1

|                                   | Healthy  | ARDS       | CPE        |
|-----------------------------------|----------|------------|------------|
| <b><i>Demographics</i></b>        |          |            |            |
| <b><i>Numbers</i></b>             | 10       | 7          | 7          |
| <b><i>Male (n, %)</i></b>         | (6, 66%) | (4, 57.1%) | (5, 71.4%) |
| <b><i>Age (years)</i></b>         | 57 ±10.7 | 60.7 ±19.2 | 60.5 ±17.6 |
| <b><i>ARDS Etiology</i></b>       |          |            |            |
| <b><i>Sepsis</i></b>              | NA       | 3(42.9)    | NA         |
| <b><i>Trauma</i></b>              | NA       | 2(28.6)    | NA         |
| <b><i>Transfusion</i></b>         | NA       | 1(14.3)    | NA         |
| <b><i>Pneumonia</i></b>           | NA       | 4(57)      | NA         |
| <b><i>Edema</i></b>               | NA       | 6(85.7)    | 7(100)     |
| <b><i>MODS</i></b>                | NA       | 3(42.9)    | 6(85.7)    |
| <b><i>Severity of illness</i></b> |          |            |            |
| <b><i>APACHE II</i></b>           | NA       | 22.25 ±3.7 | 16.4 ±3.2  |
| <b><i>Outcome</i></b>             |          |            |            |
| <b><i>Mortality (n, %)</i></b>    | NA       | 3(42.9)    | 6(85.7)    |

**Supplemental Table 1. Clinical characteristics of patients.** Data are presented as mean ± SD or number (%), unless otherwise stated; Abbreviations: ARDS: Acute Respiratory Distress Syndrome; CPE: Cardiogenic Pulmonary Edema; MODS: Multiple Organ Dysfunction Syndrome; APACHE II: Acute Physiology and Chronic Health Evaluation II.
